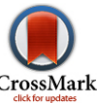

## Correction

# Correction: DUSP1 Is a Novel Target for Enhancing Pancreatic Cancer Cell Sensitivity to Gemcitabine

The *PLOS ONE* Staff

Due to an error in the preparation of Figure 5B, two of the panels in this figure are incorrect: The "Total JNK" panel for BxPC-3 cells (right) incorrectly duplicates the "Total JNK" panel for AsPC-1 cells (left). The "p-ERK1/2" panel for the BxPC-3 cells (right) incorrectly displays the "p-ERK1/2" panel for AsPC-1 cells (left). The authors apologize for these mistakes and are supplying a corrected Figure 5 and the raw blots for this figure. These errors do not affect the results and conclusions reported in the article.

**Citation:** The *PLOS ONE* Staff (2014) Correction: DUSP1 Is a Novel Target for Enhancing Pancreatic Cancer Cell Sensitivity to Gemcitabine. *PLoS ONE* 9(9): e108710. doi:10.1371/journal.pone.0108710

**Published:** September 15, 2014

**Copyright:** © 2014 The *PLOS ONE* Staff. This is an open-access article distributed under the terms of the Creative Commons Attribution License, which permits unrestricted use, distribution, and reproduction in any medium, provided the original author and source are credited.

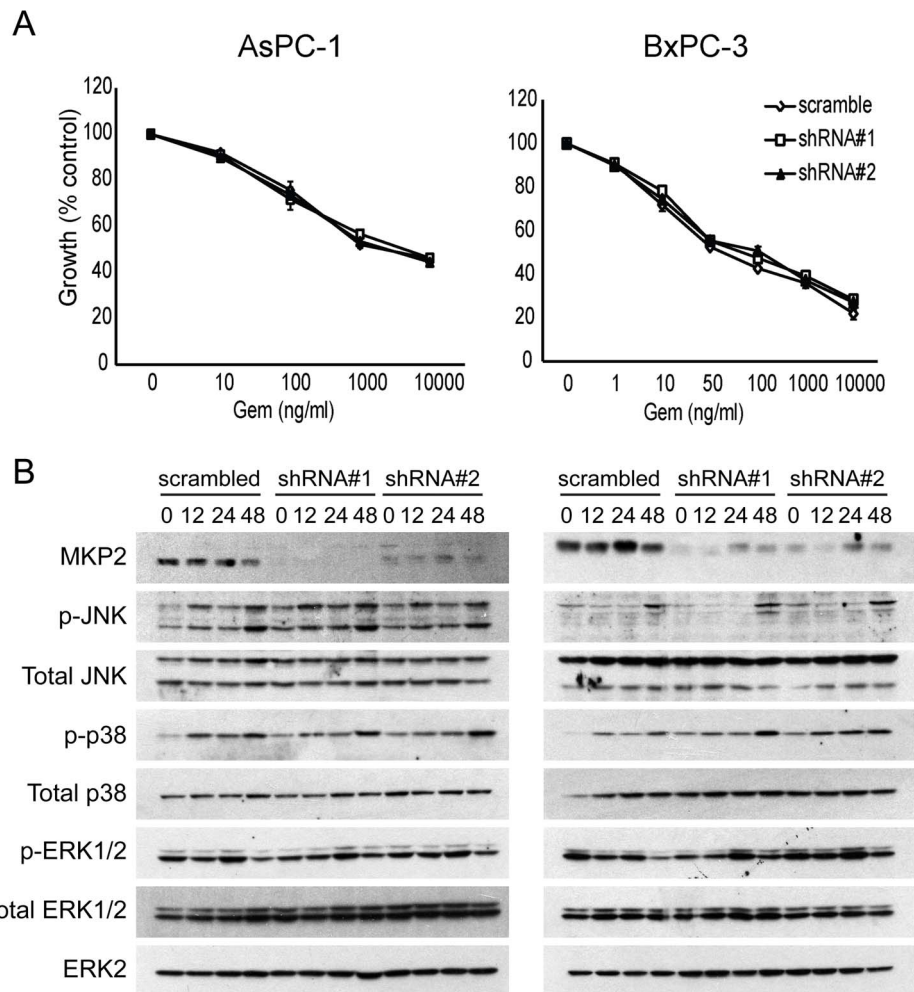

**Figure 5. Knockdown of MKP2 does not affect JNK/p38 MAPK signaling activity or pancreatic cancer chemosensitivity to gemcitabine.** AsPC-1 and BxPC-3 cells were stably transduced with lentivirus expressing shRNA against scramble control or MKP2. (A) Cells were incubated for 48 h in the absence or presence of varying concentrations of gemcitabine, and MTT assays were performed. (B) AsPC-1 and BxPC-3 cells were incubated for the indicated times with 100 ng/ml and 10 ng/ml gemcitabine, respectively, and immunoblotting was conducted. Data are the means  $\pm$  SEM of 3 experiments.  
doi:10.1371/journal.pone.0084982.g005

## Reference

1. Liu F, Gore AJ, Wilson JL, Korc M (2014) DUSP1 Is a Novel Target for Enhancing Pancreatic Cancer Cell Sensitivity to Gemcitabine. PLoS ONE 9(1): e84982. doi:10.1371/journal.pone.0084982
